# Supplementary material for: Diazo-reaction based dual-mode colorimetric-electrochemical sensing of nitrite in pickled food
Source: Royal Society of Chemistry journal article supplement (doi:10.1039/d3an01196h), 2023-01-01
Supplement: d3an01196h1.pdf [file d3an01196h1.pdf]

# **Diazo-reaction based dual-mode colorimetric-electrochemical sensing of nitrite in pickled food**

Yixin Pan, Jing Jiang, Xianwen Kan\*

Key Laboratory of Functional Molecular Solids, Ministry of Education, Anhui  
Laboratory of Molecule-Based Materials, Anhui Key Laboratory of Chemo-  
Biosensing, College of Chemistry and Materials Science, Anhui Normal University,  
Wuhu 241000, PR China

\*Corresponding author:

Xianwen Kan

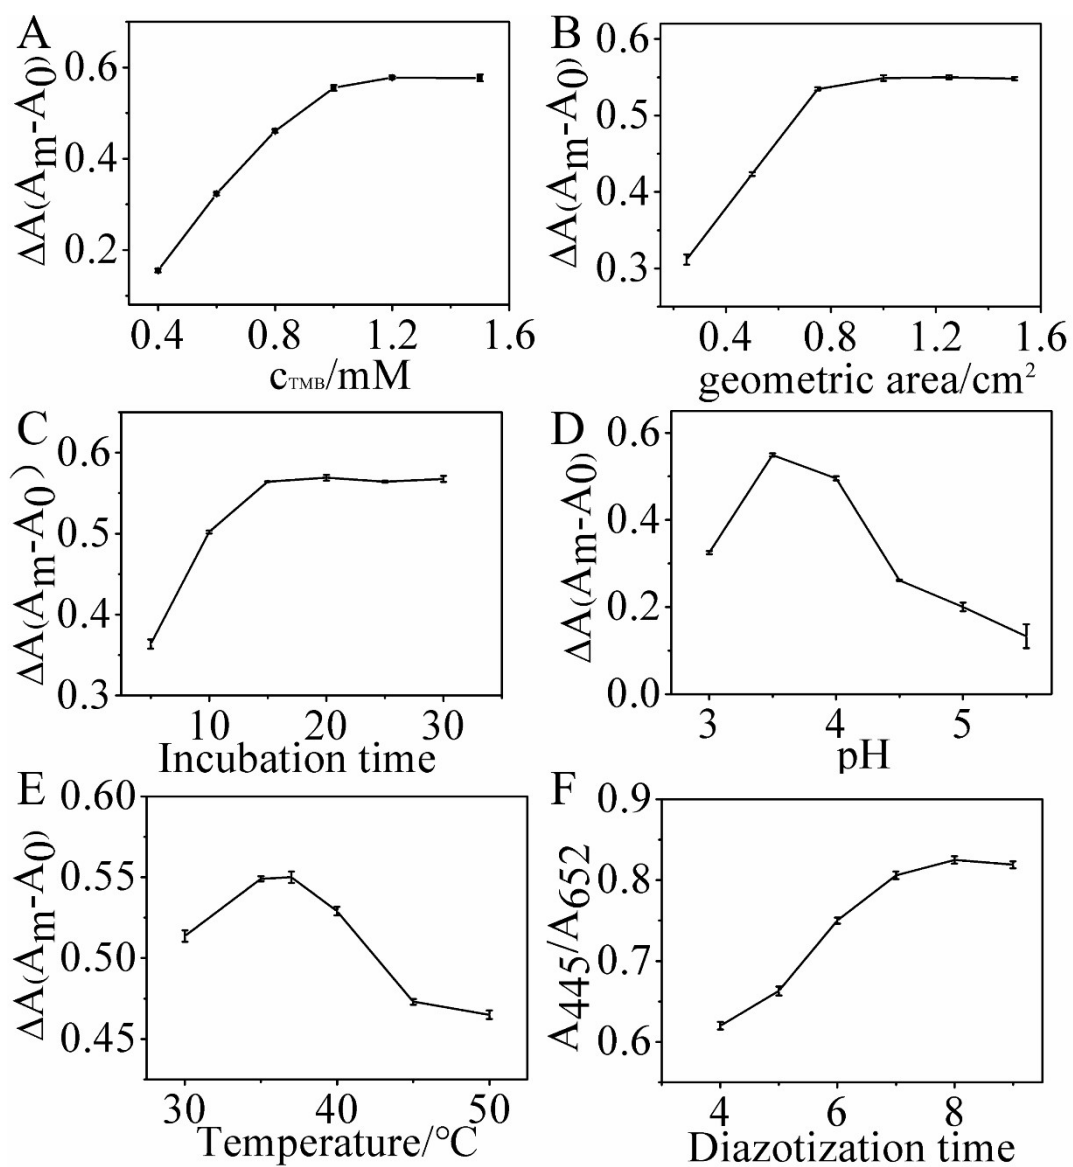

Fig. S1 The optimization of the experimental conditions: (A) the concentrations of TMB, (B) geometric area of Cu-MOFs/EGP, (C) incubation time of TMB-Cu-MOFs/EGP, (D) pH value of colorimetric sensing system, (E) temperature of colorimetric sensing system, and (F) the time of diazotization reaction.

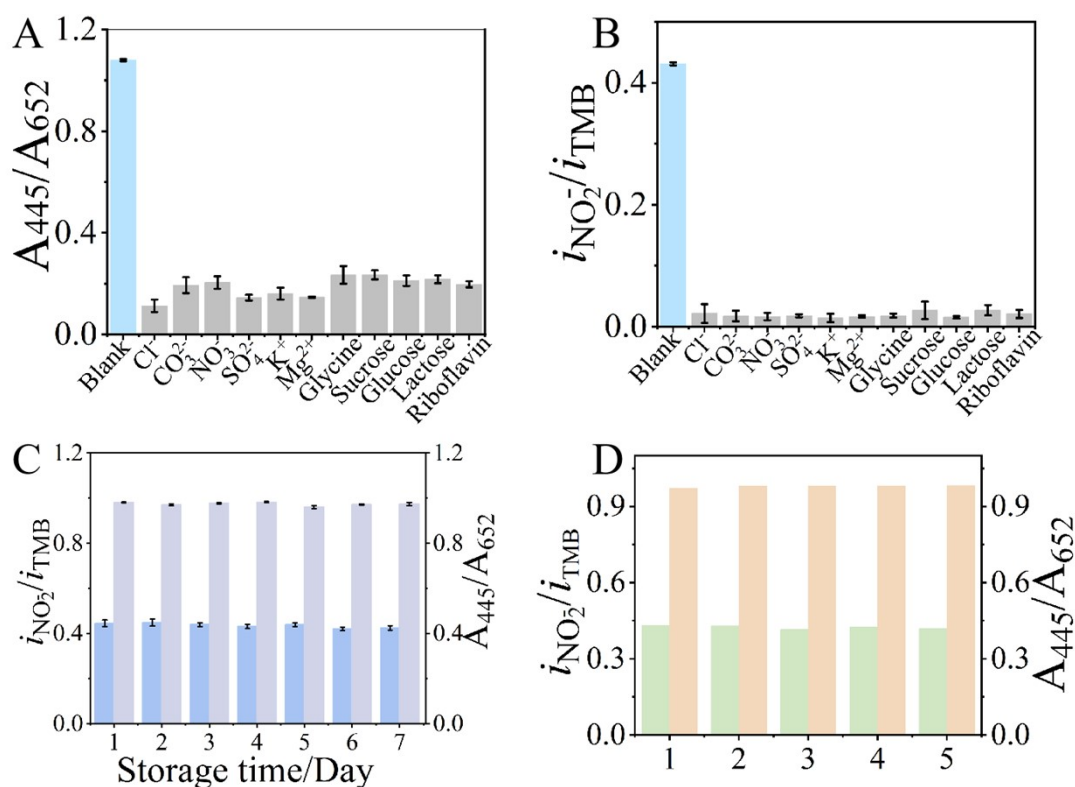

Fig. S2 Selectivity of the sensor based ratiometric colorimetric mode (A) and ratiometric electrochemical mode. The stability (C) and reproducibility (D) of the sensor.

**Table S1** Comparison of analytical performances between Cu-MOFs/EGP and other reported methods for the detection of nitrite.

| Method                      | Linear range ( $\mu\text{mol L}^{-1}$ ) | LOD ( $\mu\text{mol L}^{-1}$ ) | Ref.      |
|-----------------------------|-----------------------------------------|--------------------------------|-----------|
| Colorimetric                | 100-5000                                | 4.6                            | [1]       |
| Colorimetric                | 10-400                                  | 2.3                            | [2]       |
| Ratiometric Colorimetric    | 3.33-133.3                              | 0.2                            | [3]       |
| Ratiometric Colorimetric    | 3-150                                   | 0.4                            | [4]       |
| Electrochemical             | 5-5000                                  | 1                              | [5]       |
| Electrochemical             | 5-800                                   | 0.98                           | [6]       |
| Electrochemical             | 0-2000                                  | 9.1                            | [7]       |
| Electrochemical             | 10-380                                  | 2.4                            | [8]       |
| Ratiometric Electrochemical | 3-250                                   | 1.7                            | [4]       |
| Ratiometric Colorimetric    | 12.5-261                                | 8.5                            | This work |
| Ratiometric Electrochemical | 0.625-196                               | 0.54                           | This work |

## References

- 1 O. Adegoke, S. Zolotovskaya, A. Abdolvand and N. N. Daeid, *Talanta*, 2021, **224**, 121875. DOI: [10.1016/j.talanta.2020.121875](https://doi.org/10.1016/j.talanta.2020.121875)
- 2 H. H. Wang, X. Jing, X. Y. Bi, B. Bai, X. W. Wang, *ChemistrySelect*, **5** (2020) 9952-9956.
- 3 M. Wang, P. Liu, H. Zhu, B. Liu and X. Niu, *Biosensors-Basel*, 2021, **11**, 280. DOI: [10.3390/bios11080280](https://doi.org/10.3390/bios11080280)
- 4 M. Wang, M. Zhao, P. Liu, H. Zhu, B. Liu, P. Hu and X. Niu, *Sensor. Actuat. B-Chem.*, 2022, **355**, 131308. DOI: [10.1016/j.snb.2021.131308](https://doi.org/10.1016/j.snb.2021.131308)
- 5 Y. Han, R. Zhang, C. Dong, F. Cheng and Y. Guo, *Biosens. Bioelectron.*, 2019, **142**, 111529. DOI: [10.1016/j.bios.2019.111529](https://doi.org/10.1016/j.bios.2019.111529)
- 6 W. Yi, Z. Li, W. Dong, C. Han, Y. Guo, M. Liu and C. Dong, *ACS Appl. Nano Mater.*, 2021, **5**, 216-226.
- 7 Y. C. Wang, Y. C. Chen, W. S. Chuang, J. H. Li, Y. S. Wang, C. H. Chuang, C. Y. Chen and C. W. Kung, *ACS Appl. Nano Mater.*, 2020, **3**, 9440-9448.
- 8 H. Shi, L. Fu, F. Chen, S. Zhao and G. Lai, *Environ. Res.*, 2022, **209**, 112747. DOI: [10.1016/j.envres.2022.112747](https://doi.org/10.1016/j.envres.2022.112747)
